# Supplementary material for: Correlation analysis of the speech multiscale product for the open quotient estimation
Source: Springer Nature journal article supplement (doi:10.1186/1687-4722-2011-8), 2011-11-10

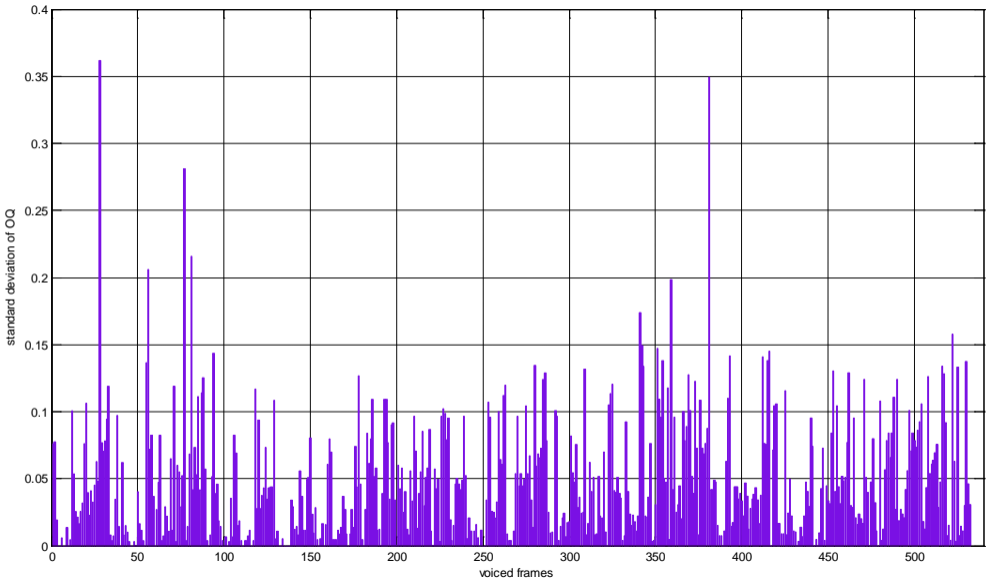

Supplement: 13636_2011_31_MOESM14_ESM.pdf [file 13636_2011_31_MOESM14_ESM.pdf]
